# Supplementary material for: Population Pharmacokinetics of Amikacin in Patients on Veno-Arterial Extracorporeal Membrane Oxygenation
Source: MDPI journal article supplement (doi:10.3390/pharmaceutics14020289), 2022-01-26
Supplement: s1 [file s1]

# Supplementary Materials: Population Pharmacokinetics of Amikacin in Patients on Veno-Arterial Extracorporeal Membrane Oxygenation

Claire Pressiat, Agathe Kudela, Quentin De Roux, Nihel Khoudour, Claire Alessandri, Hakim Haouache, Dominique Vodovar, Paul-Louis Woerther, Alice Hutin, Bijan Ghaleh, Anne Hulin, Nicolas Mongardon

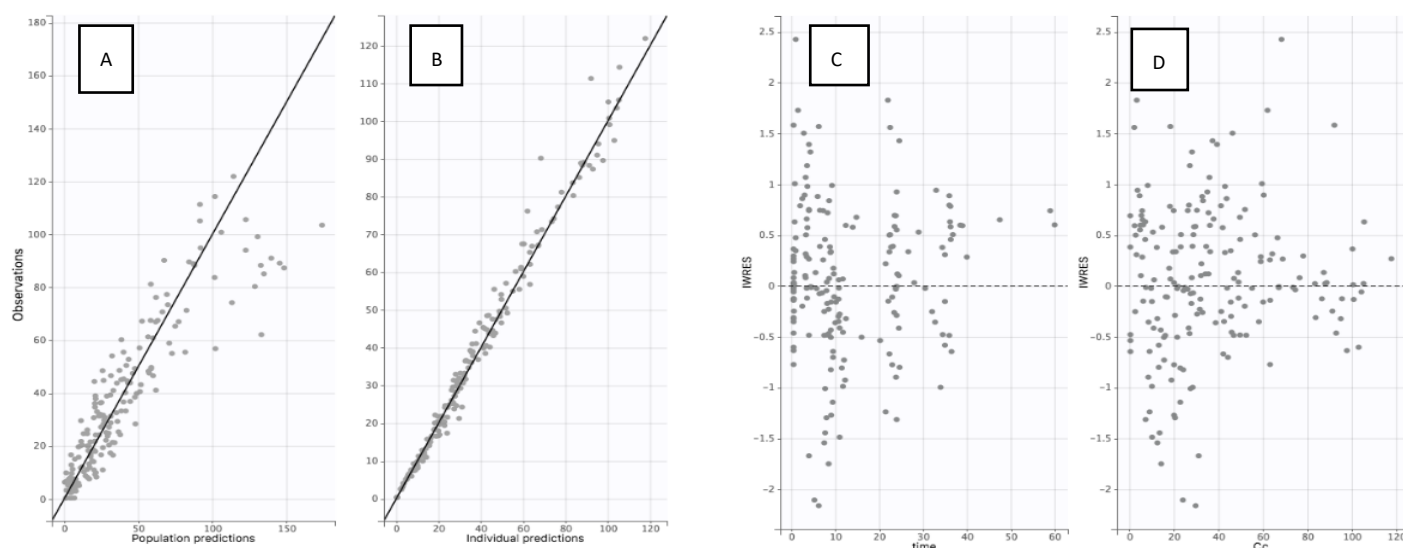

**Figure S1.** Diagnostics plots of final model: (A). Observed concentrations *vs* predicted concentrations of populations; (B). Observed concentrations *vs* individual predicted concentrations; (C). Individual weighted residues (IWRES) in time; (D). Individual weighted residues (IWRES) *vs* observed concentrations ( $C_c$ ).

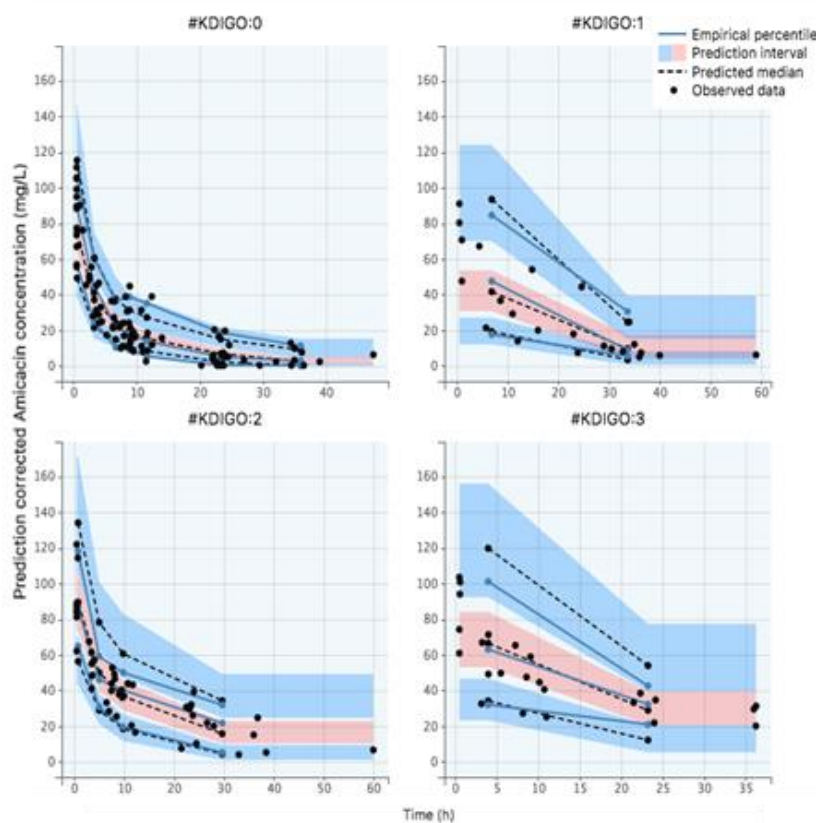

(A)

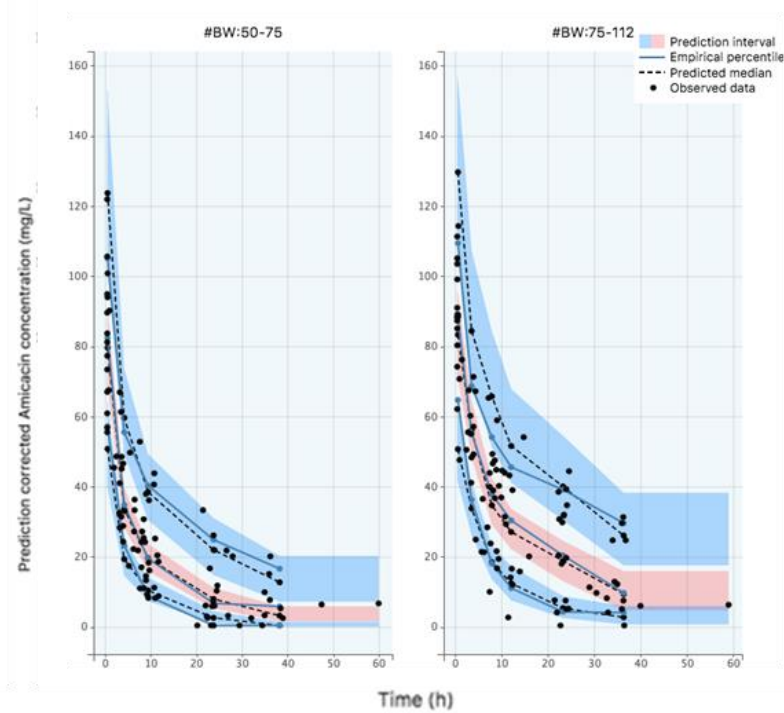

(B)

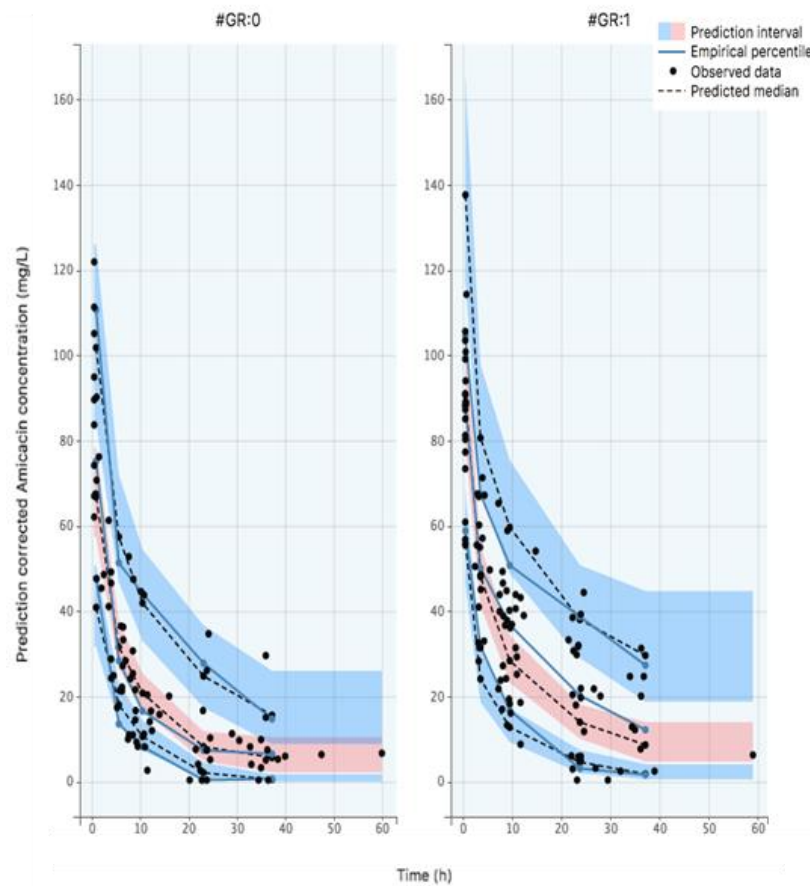

(C)

**Figure S2.** PC-VPC of final model: Depending on the KDIGO stage (A). Depending on the TBW range (B). Depending on the absence or presence of V-A ECMO support (GR = 0 for control, GR = 1 for V-A ECMO) (C).
